1 **Crystal structure of *Sulfolobus solfataricus* topoisomerase III**  
2 **reveals a novel carboxyl-terminal zinc finger domain essential**  
3 **for decatenation activity**

4 Hanqian Wang<sup>1,+</sup>, Junhua Zhang<sup>2,+</sup>, Zengqiang Gao<sup>3</sup>, Xin Zheng<sup>1</sup>, Keli Zhu<sup>1,4</sup>, Zhenfeng

5 Zhang<sup>2</sup>, Zhiyong Zhang<sup>5</sup>, Yuhui Dong<sup>1,3</sup>, Li Huang<sup>2,6,\*</sup> and Yong Gong<sup>1,\*</sup>

6 <sup>1</sup> Multi-discipline Center, Institute of High Energy Physics, Chinese Academy of Sciences,  
7 Beijing, 100049, China

8 <sup>2</sup> State Key Laboratory of Microbial Resources, Institute of Microbiology, Chinese Academy of  
9 Sciences, Beijing, 100101, China

10 <sup>3</sup> Beijing Synchrotron Radiation Facility, Institute of High Energy Physics, Chinese Academy of  
11 Sciences, Beijing, 100049, China

12 <sup>4</sup> Institute of Physical Science and Information Technology, Anhui University, Anhui, 230601,  
13 China

14 <sup>5</sup> CAS Key Laboratory for Biomedical Effects of Nanomaterials and Nanosafety, CAS Key  
15 Laboratory of Nuclear Radiation and Nuclear Energy Technology, Institute of High Energy  
16 Physics, Chinese Academy of Sciences, Beijing, 100049, China

17 <sup>6</sup> College of Life Sciences, University of Chinese Academy of Sciences, Beijing, 100049, China

18 \* Correspondence to: Yong Gong, Multidiscipline Research Center, Institute of High Energy  
19 Physics, Chinese Academy of Sciences, Beijing 100049, China; Tel: +86 10 8823 5257; Fax:  
20 +86 1088 2352 57; Email: yonggong@ihep.ac.cn

21 to Li Huang, State Key Laboratory of Microbial Resources, Institute of Microbiology, Chinese  
22 Academy of Sciences, Beijing, 100101, Tel: +86 10 6480 7606; Fax: +86 10 6480 7429; Email:  
23 huangl@im.ac.cn

24 <sup>+</sup> These authors contributed equally to the paper as the first authors.

25

26

27

28 Running title: *Crystal structure of an archaeal DNA topoisomerase III*

29 **ABSTRACT**

30 DNA topoisomerases are essential enzymes for a variety of cellular processes  
31 involved in DNA transactions. Mechanistic insights into type IA DNA  
32 topoisomerases have come principally from studies on bacterial and  
33 eukaryotic enzymes. A structural understanding of type IA topoisomerases in  
34 Archaea is lacking. Here, we present a 2.1-angstrom crystal structure of  
35 full-length *Sulfolobus solfataricus* topoisomerase III (Sso topo III), an archaeal  
36 member of type IA topoisomerases. The structure shows that Sso topo III  
37 adopts a characteristic torus-like architecture consisting of a four-domain core  
38 region and a novel carboxyl-terminal zinc finger domain (domain V).  
39 Structure-based mutation analyses reveal that a novel zinc-binding motif in  
40 domain V is essential for the DNA decatenation activity of Sso topo III. Our  
41 data indicate that Sso topo III represents a subclass of Type IA  
42 topoisomerases capable of resolving DNA catenates using a domain  
43 V-dependent mechanism.

44

45

46

47

48

49

50

51

52

53

54

55

56

57

## 58 **IMPORTANCE**

59 Type IA topoisomerases are omnipresent in all cellular life forms and serve

60 pivotal roles in cellular processes involved in DNA transactions. While  
61 considerable insights have been gained into Type IA topoisomerases from  
62 bacteria and eukaryotes, a structural understanding of type IA topoisomerases  
63 in Archaea remains elusive. we first determined the crystal structure of  
64 full-length *Sulfolobus solfataricus* topoisomerase III (Sso topo III), an archaeal  
65 member of type IA topoisomerases. Our structure provides the first molecular  
66 view of this archaeal topoisomerase, which removes negative supercoils and  
67 decatenates DNA catenane. Our findings manifest that Sso topo III may serve  
68 as an alternative prototype of type IA topoisomerases, whose decatenation  
69 mechanism differs from that of known bacterial and eukaryotic topoisomerases  
70 III such as *Escherichia coli* topoisomerase III (EcTOP3).

71

72

73

74

75

76

77

78

## 79 **KEYWORDS**

80 Archaea, DNA topoisomerase, crystal structure, zinc finger, decatenation

81 activity, enzyme mutation

82

83

84

85

## 86 **INTRODUCTION**

87 The overall topological state of DNA in cells is altered by DNA

88 topoisomerases. In all three domains of life, conserved DNA topoisomerases  
89 are essential for a wide variety of cellular processes involved in DNA  
90 transactions (1-4). There are two types of topoisomerases (1). Type I  
91 topoisomerases cut only one strand of DNA, while type II topoisomerases  
92 cleave both strands of the DNA duplex. Type I enzymes can be further  
93 classified into three different families, types IA, IB and IC, on the basis of  
94 transiently formed covalent intermediates formed (5'- or 3'- covalent  
95 intermediate) (5). *Escherichia coli* topoisomerase I (EcTOP1) and  
96 topoisomerase III (EcTOP3) are the best-characterized bacterial type IA  
97 enzymes to date.

98       A conserved toroidal fold formed by four domains (I-IV) has been found in  
99 the structures of type IA enzymes including EcTOP1 (6), EcTOP3 (7),  
100 *Thermotoga maritima* topoisomerase I (TmTOP1) (8), *Mycobacterium*  
101 *tuberculosis* topoisomerase I (MtTOP1) (9), *Mycobacterium smegmatis*  
102 topoisomerase I (MsTOP1) (10), human topoisomerase III $\alpha$  (HsTop3 $\alpha$ ) (11),  
103 human topoisomerase III $\beta$  (HsTop3 $\beta$ ) (12) and a reverse gyrase (13) from  
104 *Archaeoglobus fulgidus*, a hyperthermophilic archaeon. Structural studies  
105 (14-16) as well as biochemical (17-20) and single-molecule (21-24)  
106 experimental data have provided abundant evidences in support of an  
107 enzyme-bridged strand passage model for type IA enzymes. According to this  
108 model, a type IA topoisomerase nicks one DNA single-strand, and remains  
109 attached to the two ends of the nick. That is, the enzyme is not only covalently

110 attached to one end of the nick, but also noncovalently bound to the other end  
111 to generate a bridge through which another single-strand or the DNA duplex is  
112 passed. The following step is the resealing of the nick and the release of the  
113 enzyme. In this process, the OH group of the aromatic ring of the Tyr residue in  
114 the enzyme nucleophilically attacks the scissile phosphodiester bond,  
115 producing a transient 5' phosphotyrosine covalent bond.

116 Members of the type IA subfamily are further divided into two  
117 mechanistically distinct subclasses based on their biochemical specificity for  
118 substrates (2). EcTOP1 and EcTOP3 are the prototypes of these two  
119 subclasses of type IA enzymes. EcTOP3 catalyzes the DNA catenates more  
120 effectively than it relaxes negatively supercoiled DNA, whereas the converse is  
121 true for EcTOP1 (23, 25-28). EcTOP3, but not EcTOP1, contains a unique  
122 loop located close to the central hole (29). This positively charged loop, known  
123 as the decatenation loop, is essential for the decatenation activity of EcTOP3  
124 (24, 29).

125 Previous studies have characterized topoisomerase III (hereafter, Sso topo  
126 III) from *Sulfolobus solfataricus*, a hyperthermophilic archaeon, as a member  
127 of the type IA topoisomerase family (30, 31). A phylogenetic analysis of Sso  
128 topo III, and the observation that Sso topo III inefficiently catalyzes the  
129 relaxation of negatively supercoiled DNA, led to the suggestion that Sso topo  
130 III is more similar to EcTOP3 than to EcTOP1 (30). More recently, Bizard et al.  
131 provided convincing biochemical data in support of notion that Sso topo III is a

132 genuine decatenase that can efficiently unlink covalently closed catenanes  
133 alone at temperatures up to 90°C (32). However, little is known about the  
134 structure of type IA topoisomerases (except for reverse gyrase) from the  
135 Archaea. The structural basis for the decatenase activity of Sso topo III is  
136 unclear.

137       Here, we have determined the crystal structure of full-length Sso topo III.  
138 Sso topo III adopts a classical elongated toroidal-like shape with four domains  
139 (I-IV) forming the protein core and a novel carboxyl-terminal zinc finger domain  
140 (domain V) tethered to the core against domain II. Furthermore, domain V is  
141 conserved among DNA topoisomerases III from the TACK superphylum of the  
142 Archaea. In addition, structure-based mutational analyses show that, whereas  
143 the zinc-binding motif of domain V was required for efficient DNA relaxation by  
144 Sso topo III, its depletion nearly abolished the DNA decatenation activity of the  
145 enzyme. These findings indicate that Sso topo III may represent as a novel  
146 type of topoisomerases III which employ a decatenation mechanism distinctly  
147 different from that of known bacterial and eukaryotic equivalent.

148

149

## 150 **RESULTS**

151       **Overall structure of intact Sso topo III** To obtain crystals of Sso  
152 topo III, we overproduced and purified sufficient quantities of the mutant  
153 enzyme (Y318F) in which the catalytic residue Tyr318 was replaced with Phe  
154 (Fig. 1 A). The structure of the full-length enzyme was determined at 2.1 Å

155 resolution using molecular replacement (Table 1). The full-length protein  
156 formed an asymmetric unit comprising four *Sso* topo III molecules. The four  
157 molecules had essentially the same architecture. For convenience, one  
158 molecule was chosen for the following structural analyses.

159 Our analysis showed that the overall structure of *Sso* topo III comprises four  
160 domains (I–IV) (residues 1–593), forming the conserved core, and a novel  
161 carboxyl-terminal domain V (residues 594–668) (Fig. 1A, 1B and S1). The  
162 enzyme adopts a canonical toroidal-like elongated configuration with a large  
163 hole (Fig. 1B and 1C), which is shared by all known type 1A topoisomerases  
164 (33). The enzyme-bridged strand passage model proposes that the hole  
165 accommodates single or double-stranded DNA (34).

166 Domain I (residues 1–219) exhibits a topoisomerase–primase fold (2), which  
167 is found in type IA, IIA, and IIB topoisomerases, as well as in bacterial  
168 primases. Within domain I, a disulphide bridge crosslinks Cys4 of a loop  
169 (residues 1–10) and Cys34 of an  $\alpha/\beta$  fold consisting of six parallel  $\beta$  strands  
170 sandwiched with four  $\alpha$  helices (Fig. S1). This connection results in tight  
171 packing of domain I and stabilizes its architecture. In Domain II (residues  
172 220–277, 408–474), the hinge region (residues 218–224, 471–480) is  
173 composed of two loops linking domains I and II, and II and IV, respectively (Fig.  
174 1B). The hinge is believed to serve as the principal pivot point for opening and  
175 closing of the DNA gate in the strand passage reaction (6, 11, 35).

176 A long loop (residues 594–616) leads from helix  $\alpha$ 18 of domain IV to  
177 domain V (residues 594–668), thus linking the core of the enzyme to domain V  
178 (Fig. 1B and S1). Domain V attaches to the top of the topoisomerase (domain  
179 II) against the hinge region (Fig. 1B and 1C). Three antiparallel  $\alpha$ -helices,  
180 including helix  $\alpha$ 19 (residues 616–636), helix  $\alpha$ 20 (residues 640–649), and  
181 helix  $\alpha$ 21 (residues 655–666), are coiled around each other to constitute the  
182 bulk of domain V (Fig. 1B). Interestingly, four residues (Cys602, Cys605,  
183 Cys615 and His618) coordinate with a zinc atom to generate a novel  
184 zinc-binding motif (Fig. 1D and S1). Among them, the three Cys residues come  
185 from the long loop connecting domains IV/V and the His residue is from helix  
186  $\alpha$ 19. The presence of the zinc-binding site was confirmed by an analysis of the  
187 anomalous difference Fourier map (Fig. 1D). The recently characterized  
188 mesophilic archaeal topoisomerase, *Methanosarcina acetivorans* topo III $\alpha$   
189 (*Mac* topo III $\alpha$ ), also has one zinc-binding site (36). However, the zinc-binding  
190 motif of *Sso* topo III is the Cys3His1 type, whereas that of *Mac* topo III $\alpha$  is  
191 tetraCys type. For *Sso* topo III, the zinc finger motif may contribute to the  
192 stabilization of domain V. As revealed by sequence alignment, the  
193 carboxyl-terminal zinc finger motif of the Cys3His1 type is highly conserved  
194 among topoisomerases from the Crenarchaeota (Fig. S2A), suggesting that  
195 this motif plays an important role. Intriguingly, small proteins homologous to  
196 domain V are also found in Thaumarchaeota and Bathyarchaeota, both of  
197 which are phyla within the TACK superphylum where Crenarchaeota also



198 belong, as well as Euryarchaeota and Thorarchaeota (Fig. S3). Homologues of  
199 Sso topo III are present in Thaumarchaeota, Bathyarchaeota, Euryarchaeota  
200 and Thorarchaeota, but these enzymes almost lack the carboxyl-terminal  
201 domain similar to domain V in Sso topo III. It would be of interest to determine  
202 if the domain V-like small proteins physically and functionally interact with the  
203 type IA topoisomerases in these organisms. Notably, no structural elements  
204 similar to domain V of Sso topo III is found in the Protein Data Bank, as  
205 detected by DALI (37). These results suggest that the carboxyl-terminal fold of  
206 Sso topo III, also found in several archaeal lineages, is unique.

207 **Interface of domains II and V** A distinguishing feature of the overall  
208 structure of Sso topo III compared with that of other known available type IA  
209 topoisomerases is the presence of three helices in domain V located close to  
210 the hinge region of domain II (Fig. 1B). Two flexible loops, each about five  
211 residues long, link these three helices. This arrangement causes the three  
212 helices to pack against each other so that their movement is highly  
213 coordinated, but they maintain a degree of flexibility. Additionally, within the  
214 long linker loop (about 20 residues) connecting domains IV and V, there are  
215 three successive turns, which maintain free space between the two domains.  
216 The novel zinc-binding motif, located on the carboxyl-end of the long loop,  
217 contributes to the stabilization of the loop (Fig. 1D). By analogy to the other  
218 solved type IA topoisomerases (6), the interfaces between domain III and

219 domains IV and I in Sso topo III are conserved and far-ranging. However, the  
220 interface between domains II and V within the enzyme is unique.

221       The longest one of the three helices in domain V, helix  $\alpha$ 19, acts as the  
222 major binding platform for the interface between domains II and V. The  
223 interface is mostly, but not exclusively, hydrophobic (Fig. 1E). Extensive  
224 hydrophobic interactions mainly occur between the side chains of Leu219,  
225 Phe220, Ile221, Pro222, Leu223, Pro224 and Phe226 in the hinge region,  
226 which connects helix  $\alpha$ 6 of domain I with strand  $\beta$ 9 of domain II, and the side  
227 chains of Ala621, Leu625, Ala628, Leu631, Trp632 in helix  $\alpha$ 19 and Tyr656,  
228 Val657 in helix  $\alpha$ 21 of domain V (Fig. 1E). Moreover, the main chain amides of  
229 Gly654 and Lys655 in domain V form hydrophilic interactions with the  
230 backbone carbonyl groups of Phe220 and Asn218 in the hinge region,  
231 respectively, while the amide of Tyr656 makes hydrophilic interaction with the  
232 backbone carbonyl groups of Asn218 (Fig. 1F). In addition, the NH group on  
233 an indole group of Trp632 makes a hydrogen bond with the backbone carbonyl  
234 group of Pro222. These interactions further stabilize the attachment of domain  
235 V to domain II. Most importantly, the main chain carbonyl group and side chain  
236 amide of Arg635 in the carboxyl-end of helix  $\alpha$ 19 in domain V form hydrogen  
237 bonds with the main chain amide of Ile250 at the amino-end of helix  $\alpha$ 7 and the  
238 carbonyl group of Pro224 at the amino-end of strand  $\beta$ 9 in domain II,  
239 respectively (Fig. 1F). Domain V and the main part of domain II are connected  
240 by a single interaction, that is, double hydrogen bonds involving Arg635. This

241 may allow for independent and coordinated movements of domain V relative to  
242 domain II at different stages during catalysis. Noticeably, Glu608 from domain  
243 V forms salt bridge with Lys592 from domain IV on the other end of the  
244 interface. Alignment of the sequences of type IA topoisomerases from the  
245 Crenarchaeota shows that most of the above-mentioned residues contributing  
246 to the interaction between domains II and V are highly conserved (Fig. S2B).  
247 This implies that the interaction between domains II and V may be essential for  
248 the functional role of domain V of the archaeal topoisomerases.

249 **Comparison of the interactions around the hinge region**  
250 **among type IA topoisomerases** The studies on EcTOP3 (7, 14, 29)  
251 indicated that the decatenation loop on domain IV is critical for efficient DNA  
252 decatenation (Fig. 2A). A recent report on Sso topo III provides strong  
253 biochemical evidence that the enzyme is a true decatenase (32). Surprisingly,  
254 the structural equivalent of the decatenation loop is absent from Sso topo III  
255 (Fig. 2A), suggesting that DNA decatenation by Sso topo III may differ  
256 mechanistically from that by EcTOP3.

257 It is believed that the highly conserved hinge region joining domains II and IV  
258 appears to be important for strand passage during catalysis (6). To understand  
259 the decatenation mechanism of Sso topo III, we performed a structural  
260 analysis of the potential interactions within the available type IA  
261 topoisomerases between the hinge region and the carboxyl-terminal domain or  
262 an additional subunit of the topoisomerase complex. No direct interactions

263 exist between the hinge regions and the C-terminus in TmTOP1 (8), MtTOP1  
264 (9) and MsTOP1 (10). However, there are direct interactions between the  
265 hinge region and parts of the carboxyl-terminal domain in several  
266 topoisomerases or the other subunit of a topoisomerase complex (Fig. 2B).  
267 The interactions may influence the opening state of their gates. The human  
268 BLM helicase, topoisomerase III $\alpha$  (HsTop3 $\alpha$ ) and RMI1 proteins form a  
269 minimal protein complex, which catalyses the dissolution of double-Holliday  
270 junctions (dHJ) to produce non-crossover products (38). A structural analysis  
271 of the Top3 $\alpha$ –RMI1 complex showed that the hinge region makes intimate  
272 contacts with the decatenation loop of the RMI1 subunit by hydrophobic  
273 interaction, suggesting that this contact contributes to the modulation of the  
274 opening-closing state of the gate in Top3 $\alpha$  (11) (Fig. 2B). Similar to the  
275 Top3 $\alpha$ –RMI1 complex, Top3 $\beta$  forms a complex with the TDRD3 subunit. A  
276 structural analysis of the complex indicated that the hinge region of Top3 $\beta$  is a  
277 little bit apart from the insertion loop of TDRD3 (12) (Fig. 2B). In the case of  
278 EcTOP1, the interaction between a unique  $\alpha$  helix in domain VI of the  
279 carboxyl-terminal domain and the hinge region mediates the major direct  
280 contact between the carboxyl-terminal domain and the catalytic core (39) (Fig.  
281 2B). The conformational changes of the carboxyl-terminal domain are  
282 potentially transferred to the hinge region through the unique helix in domain  
283 VI at some points in the catalytic cycle, thereby regulating the opening-closing  
284 state of the gate. In *Sso* topo III, major contacts between the hinge region and

285 the longer helix  $\alpha$ 19 of domain V occur through stable and extensive  
286 hydrophobic interactions (Fig. 2C), and several hydrogen bonds, located at the  
287 two ends of the interface between domains II and V, are involved in the  
288 interaction between domain V and the bulk of domain II and domain IV,  
289 respectively (Fig. 1F). This network of interactions may allow domain V to  
290 adhere to the hinge region mainly by the  $\alpha$ 19 helix during the strand passage  
291 reaction, and possibly make the bulk of domain II and domain IV to move  
292 relative to the hinge region at some points during the catalysis.

293 **Deletion of the zinc-binding motif reduces the relaxation**  
294 **activity of Sso topo III** To explore the role of the carboxyl-terminal domain,  
295 the zinc-binding motif in particular, in DNA relaxation by Sso topo III, a  
296 carboxyl-terminally truncated mutant (597 $\Delta$ C), which lacked whole domain V,  
297 and a quadruple mutant (CCCH/4A), in which the four residues (Cys602,  
298 Cys605, Cys615 and His618) coordinating with the zinc atom were all replaced  
299 with Ala, were generated by mutagenesis (Table S1). In the CCCH/4A, the  
300 mutation of the zinc-binding motif (3Cys1His type) resulted in the elimination of  
301 the zinc atom (Fig. 1D). These two mutant proteins were overproduced in *E.*  
302 *coli* and purified to homogeneity. The two mutant proteins showed the same  
303 optimal temperature as the wild-type enzyme (75°C) in DNA relaxation (Fig.  
304 S4). 597 $\Delta$ C possessed about 50% of the wild-type activity (Fig. 3, compare top  
305 and middle panel), whereas CCCH/4A retained about 15% of the wild-type

306 activity (Fig. 3, compare top and bottom panel). These results indicated that  
307 the zinc-binding motif is necessary for efficient relaxation by *Sso* topo III.

308 To compare DNA relaxation reactions catalysed by wild-type and mutants  
309 of *Sso* topo III, a time-course assay was performed (Fig. 4). The wild-type  
310 protein displayed a profile of topoisomers indicative of a distribute mechanism  
311 of relaxation (Fig. 4, top panel), as described recently (32). However, both  
312 597 $\Delta$ C and CCCH/4A exhibit a relaxation profile differently from the wild-type  
313 *Sso* topo III (Fig. 4, compare top, middle, and bottom panel). The DNA  
314 relaxation reaction catalysed by 597 $\Delta$ C appeared to more distributive than that  
315 by the wild-type protein. Interestingly, the relaxation reaction becomes more  
316 distributive, when the unique zinc-binding motif was eliminated, than that as  
317 the carboxyl-terminal domain of *Sso* topo III was wholly deleted (Fig. 4).  
318 Together, these results indicated that domain V, especially the zinc-binding  
319 motif, facilitates the relaxation of negatively supercoiled DNA by *Sso* topo III.

320 To probe the potential roles of domain V in *Sso*Topo III, we also  
321 determined ssDNA binding by the domain V-deletion mutant protein 594 $\Delta$ C  
322 (residues 1-594). The mutant protein showed a ~ 5-fold lower affinity than  
323 wild-type *Sso*Topo III for a 32-nt ssDNA containing the preferred cleavage site  
324 (designated C32) than the wild-type protein (Fig. S5). Therefore, it appeared  
325 that domain V contributes significantly to template binding by *Sso*Topo III.

### 326 **The novel zinc-binding motif is essential for DNA**

327 **decatenation by *Sso* topo III** To explore the role of the novel domain V

328 in *Sso* topo III-catalysed decatenation, wild-type and mutants of *Sso* topo III  
329 were subjected to a decatenation assay using kinetoplast DNA (kDNA) (40) as  
330 the substrate. Wild-type *Sso* topo III was optimally active in kDNA  
331 decatenation at 90°C, in consistent with the observation made previously (32)  
332 (Fig. S6A, B, C). The fast-migrating bands, corresponding to closed minicircles,  
333 were present when the reactions were performed at very high temperatures  
334 (90 °C) (Fig. 5A). These closed minicircles were released from the kDNA  
335 network by *Sso* topo III, because the enzyme apparently was unable to relax  
336 supercoiled DNA at 90 °C and above, but was still able to decatenate DNA  
337 catenanes (32). Therefore, the presence of closed minicircles at very high  
338 temperature was considered as a measure of the decatenation activity of *Sso*  
339 topo III. The bands corresponding to closed minicircles were undetectable in  
340 reactions containing 597ΔC (Fig. 5B), suggesting that the mutant protein had  
341 no detectable decatenation activity at very high temperature. Similarly,  
342 CCCH/4A was nearly inactive in decatenation (Fig. 5C). Taken together, we  
343 concluded that domain V, the zinc-binding motif in particular, is essential for  
344 the decatenation activity of *Sso* topo III.

## 345 **DISCUSSION**

346 Type IA topoisomerases are found in all three domains of life. Much of current  
347 knowledge about the enzymes has come from structural and biochemical  
348 studies on the ones from bacterial and eukaryotic origins (41). A structural  
349 understanding of type IA topoisomerases (except for reverse gyrase) in the

350 Archaea remains elusive. In this work, we present the crystal structure of Sso  
351 topo III, an archaeal type IA topoisomerase, at 2.1 Å resolution. The structure  
352 provides the first molecular view of this archaeal topoisomerase, which  
353 removes negative supercoils and decatenates DNA catenane (30, 32, 42). Sso  
354 topo III is toroidal in shape with a four-domain protein core closely resembling  
355 that found in other members of the topoisomerase IA family (6). A striking  
356 feature of Sso topo III is the presence at its carboxyl-terminus of a novel zinc  
357 finger-containing part that attaches to the hinge region of domain II. Intriguingly,  
358 the enzyme lacks the decatenation loop found in some of the known type IA  
359 topoisomerases capable of DNA decatenation. As revealed by mutational  
360 analysis, the zinc-binding motif is critical for effective decatenation of Sso topo  
361 III. Therefore, Sso topo III represents a novel type of topoisomerases which  
362 employ a DNA decatenation mechanism different from those of the known  
363 bacterial and eukaryotic topoisomerases III.

364 The carboxyl-terminal domain of a type IA topoisomerase varies widely in  
365 composition, length and shape (41, 43), as well as in orientations relative to  
366 the hinge region of the enzyme. Despite wide variations, the carboxyl-terminal  
367 domain exhibits ssDNA-binding activity, and is responsible for the high  
368 DNA-binding affinity of the enzyme. In the case of EcTOP1, domain IV extends  
369 into the carboxyl-terminal domain consisting of three zinc ribbon domains  
370 containing the tetracysteine motif and two zinc ribbon-like domains (39).

371 Among the five domains, four domains bind to ssDNA with primarily  $\pi$ -stacking



372 and cation- $\pi$  interactions. Similarly, TmTOP1 has a zinc ribbon motif, but  
373 without a bound zinc ion, at its C-terminus (8). The deletion of the  
374 carboxyl-terminal domain resulted in a significant loss of the relaxation activity  
375 of TmTOP1, possibly due to the reduction in DNA-binding by the mutant  
376 protein (44, 45). By comparison, the truncation of the carboxyl-terminal domain  
377 almost abolished the relaxation activity of EcTOP3 (46), whose C-terminus  
378 displayed a partially disordered structure (7, 14). Unlike EcTOP1, MtTOP1 has  
379 four tandem novel folds, but not the zinc-binding motif, at the C-terminus (9).  
380 Similar to EcTOP3, the partial truncation of the carboxyl-terminal domain  
381 abolished the relaxation activity of MtTOP1. It is generally believed that the  
382 carboxyl-terminal domains of these two topoisomerases have ssDNA-binding  
383 activity, although they lack a zinc-binding motif. Our structure of *Sso* topo III  
384 provides the first molecular view of the carboxyl-terminal domain of an  
385 archaeal type IA topoisomerase (Fig. 1B). The carboxyl-terminal domain of  
386 *Sso* topo III is unique, and harbours a zinc-binding motif (3Cys1His type) (Fig.  
387 1D) that differs from the tetracysteine zinc-binding motif conserved in  
388 prokaryotic type IA topoisomerases such as EcTOP1 (39). A structural  
389 analysis of the EcTOP1-DNA complex demonstrated that a zinc ribbon domain  
390 or zinc ribbon-like domain, mainly consisting of  $\beta$ -sheets, is capable of binding  
391 ssDNA, implying that these domains may not bind double-stranded DNA. In  
392 some enzymes involved in DNA transactions, the zinc-finger domains, which  
393 contain  $\alpha$ -helices, bind to double-stranded DNA (47). It will be interesting to

394 determine whether the carboxyl-terminal fold of Sso topo III can bind  
395 double-stranded DNA. In Sso topo III, the zinc-binding motif is required for  
396 efficient relaxation activity (Fig. 3 and 4). By comparison, TmTOP1 (44)  
397 remained fully active in DNA relaxation when the zinc ribbon motif was deleted  
398 while EcTOP1 (48) was inactive when the zinc ion was removed.

399 The first solved structure of a type IA topoisomerase indicates that domains  
400 II and III may move away from domains I and IV in the strand passage reaction  
401 (6). Further evidence for this movement has been provided by biochemical (19,  
402 21), structural data (14, 15, 35) and single-molecule experiments (22-24). A  
403 structural comparison between EcTOP3 and EcTOP1 indicates that there are  
404 two unique insertions in EcTOP3 in the vicinity of its central hole (29) (Fig. 2A).  
405 One insertion (the decatenation loop) is rich in basic amino acids within  
406 domain IV of EcTOP3, and the other (the acidic loop) is abundant in acidic  
407 amino acids and is located within domain II (2) (Fig. 2A). Decatenation by the  
408 enzyme is driven primarily by the interaction between the decatenation loop  
409 and the acidic loop, both of which line the central hole of the topoisomerase,  
410 during its gate dynamics. Compared with the interaction in EcTOP1, that in  
411 EcTOP3 presumably stabilizes and holds the open state for longer, thus  
412 allowing sufficient time for EcTOP3 to catch duplex DNA and pass it through  
413 the break in a single strand into the gate (24). In the eukaryotic Top3a-RMI  
414 complex, RMI1 coordinates the gate dynamics of Top3a through its unique  
415 decatenation loop, which has a functionally equivalent role to that of the

416 decatenation loop in EcTOP3 (11). Hence, a unified loop-mediated  
417 decatenation mechanism for prokaryotic and eukaryotic topoisomerases III  
418 has been proposed (11).

419 Our results demonstrated that the zinc-binding motif is essential for the DNA  
420 decatenation activity of Sso topo III (Fig. 5C). We provided the following  
421 evidence in support of the notion that the decatenation mechanism of Sso topo  
422 III is distinct from the current loop-mediated decatenation mechanism  
423 proposed for type IA topoisomerase: (i) The decatenation domain (domain V)  
424 of Sso topo III is a novel zinc finger fold (Fig. 1D), whereas the decatenation  
425 loop is present in domain IV of EcTOP3 (29) (Fig. 2A). (ii) The decatenation  
426 domain (domain V) of Sso topo III is on the outer edge of the topoisomerase  
427 gate and attaches to domain II through the hinge region by extensive  
428 hydrophobic interactions (Fig. 1D and 2C), whereas the decatenation loop in  
429 EcTOP3 lines the DNA gate and is away from the hinge region of the catalytic  
430 core (24) (Fig. 2A). (iii) The 594 $\Delta$ C mutant lacking domain V showed an  
431 approximately 5-fold reduction in ssDNA-binding compared with wild-type Sso  
432 topo III (Fig. S5). In contrast, the deletion of the decatenation loop from  
433 EcTOP3 did not reduce its ssDNA-binding activity (29). Obviously, further  
434 biochemical studies are needed to understand the molecular details of the  
435 unlinking of covalently closed catenanes catalysed by Sso topo III.

436

## 437 **MATERIALS AND METHODS**

438           **Plasmid and DNA constructs** Using the standard PCR cloning  
439 strategy, Sso topo III gene from *S. solfataricus* genome was cloned into the  
440 *NdeI* and *XhoI* sites of the modified version of vector pET28a (Novagene),  
441 which harbored an N-terminal poly-histidine tag followed by a tobacco etch  
442 virus (TEV) protease cleavage site (ENLYFQ/G) (where ‘/’ donates the  
443 cleavage site). However, the growth of *E.coli* cells harboring wild-type Sso  
444 topo III gene were severely inhibited, possibly due to its toxicity. So, Sso topo  
445 III gene was mutated to the Sso topo III Y318F by replacing residue Tyr318  
446 with Phe using the QuickChange™ Site-Directed Mutagenesis Kit (Stratagene)  
447 according to the instructions of manufacturer. Site-directed mutagenesis of the  
448 other Sso Topo III mutants used in this study was carried out according to  
449 modified QuickChange™ protocol (49). All the plasmid constructs and mutants  
450 were confirmed by DNA double strands sequencing. Primers for Sso Topo III  
451 site-directed mutagenesis are listed in Table S1.

452           **Protein Expression and Purification** The recombination Sso  
453 topo III Y318F was overexpressed as a fusion protein with an N-terminal  
454 poly-histidine tag in *E. coli* strain Rosetta2 (DE3) pLysS (Novagen). For each  
455 purification procedure, 10-l *E. coli* cultures harbouring fusion proteins were  
456 grown in the shaker at 37°C at 185 r.p.m. When their density reached an  
457 OD<sub>600nm</sub> of 1.2, sodium citrate was added into cultures to a final concentration  
458 of 100 mM and temperature of the cultures dropped to 25°C, followed by the  
459 addition of isopropylb-D-thiogalactoside to a final concentration of 0.5 mM.

460 After growth for further 6 h at 25°C, the cultures were harvested, and the  
461 resulting cell sediments were suspended in a solubilization buffer containing  
462 20 mM Tris-HCl (pH 8.0), 2 mM potassium citrate, 2 mM MgCl<sub>2</sub>, 10 mM  
463 imidazole and 500 mM NaCl supplemented with DNAase I (55 µg/ml,  
464 Amersco), followed by disruption with a French press at 12,000 p.s.i. for three  
465 cycles. To remove cell debris, cell lysates were centrifuged for 40 min at  
466 16,000 r.p.m. The resultant supernatant was collected and loaded onto an  
467 equilibrated Ni<sup>2+</sup> Chelating Sepharose™ Fast Flow column (GE Healthcare).  
468 Purification procedure with the nickel column were performed as described  
469 before (50), except the insertion of an additional wash with high-salt of 1 M  
470 NaCl. After several wash, Sso topo III Y318F protein was eluted with a buffer  
471 containing 20 mM Tris-HCl (pH 8.0), 2 mM potassium citrate, and 300 mM  
472 NaCl supplemented with 300 mM imidazole. The eluate was digested using  
473 TEV protease to remove the poly-histidine tag, and dialyzed against buffer I  
474 (20 mM Tris-HCl, pH 7.5, 10 mM potassium citrate, 150 mM NaCl) overnight at  
475 4°C. The resultant eluate was filtered through a 0.45 µm filtration membrane  
476 and then loaded onto a 5 ml SOURCE 15S column (GE Healthcare)  
477 equilibrated with buffer I. The column was eluted with an 80 ml linear gradient  
478 from 150 mM NaCl to 500 mM NaCl, both in buffer I. The fractions, eluted at  
479 0.45-0.50 M NaCl, were pooled and concentrated to 4 mg ml<sup>-1</sup> in a buffer  
480 containing 20 mM Tris-HCl (pH7.5), 150 mM NaCl, 10 mM potassium citrate,

481 and 2 mM DTT for later usage. Purified protein was analysed by SDS-PAGE

482 for purity and quantified with Bradford assay using BSA as standards.

483 Expression and purification of the other *Sso* Topo III mutants (597ΔC and  
484 CCCH/4A) were carried out according to the procedure described above, with  
485 the exception of ion-exchange column chromatography in the final purification  
486 step. The resultant nickel column eluate was loaded onto a 5 ml SOURCE 15Q  
487 column (GE Healthcare), instead of 15S column, equilibrated with buffer I. The  
488 column was eluted with an 80 ml linear gradient from 0.150 mM NaCl to 1.0 M  
489 NaCl, both in buffer I. The fractions, eluted at 0.55-0.65 M NaCl, were pooled.

490 **Crystallization** *Sso* topo III Y318F was crystallized by the sitting-drop  
491 vapor diffusion method, with 0.7μl drops of protein or protein-ssDNA complex  
492 mixed with an equal volume of reservoir solution. Initial crystallization trials  
493 screen clustered-needle-shaped crystals in reservoir solution containing 8%  
494 (v/v) Tacsimate (pH 4.4), and 20% (w/v) Polyethyleneglycerol 3,350. Further  
495 optimization of the crystallization condition led to the appearance of  
496 rod-shaped crystals in the well in which 0.7μl protein solution was mixed with  
497 an equal volume of reservoir solution consisting of 8% (v/v) Tacsimate (pH 4.4),  
498 and 13.75% (w/v) Polyethyleneglycerol 3,350 at 12°C. The diffraction-level  
499 crystals, by the microseeding method, appeared one week later and reached a  
500 maximum size within 2 months. These crystals in the mother liquor were  
501 exposed to air for 10 min, and transferred into a drop of paraffin and NVH mix  
502 oil before being cryocooled by plunging rapidly in liquid nitrogen.

503           **Crystallographic Data Collection, Structure determination**

504   **and Refinement** X-ray diffraction data were collected at the BL17U  
505   beamline of the Shanghai Synchrotron Radiation Facility, and indexed,  
506   integrated and scaled using the HKL2000 package (51). The initial phases  
507   were determined by molecular replacement using the program PHASER (52),  
508   with the structure of TmTOP1 (PDB ID: 2GAJ) as a searching model. The  
509   structure refinement was carried out with phenix.refine (53) and Refmac5 (54).  
510   Model building was carried out by iterative rounds of manual building with Coot  
511   (55). MolProbity (56) was used to validate the structure. Data collection and  
512   refinement statistics are listed in Table 1.

513           **Assays of decatenation and relaxation activities** DNA

514   relaxation assay was performed as described previously (30), except that the  
515   final concentration of MgCl<sub>2</sub> is 20 mM, instead of 10 mM, in the standard  
516   reaction mixture. Decatenation of kinetoplast DNA (kDNA) was carried out by a  
517   similar protocol except that 400 ng kDNA ([www.topogen.com](http://www.topogen.com)) was used as  
518   substrate in each standard reaction mixture. Reaction mixes were incubated at  
519   90 °C for 30 min unless specified temperature otherwise, and the  
520   enzyme-catalysed products were examined by electrophoresis in the indicated  
521   agarose gels.

522           **Data availability** Atomic coordinates and structure factors for the  
523   crystal structure of Sso topo (apo) have been deposited in the Protein Data  
524   bank under accession codes 6K8N.

525

## 526 **SUPPORTING INFORMATION**

527 Additional supporting information may be found online in the Supporting

528 Information section.

529

530

531

532

533

## 534 **ACKNOWLEDGEMENTS**

535 We are grateful to Dr. Mei Li and the staff of beamline BL17U at the Shanghai

536 Synchrotron Radiation Facility and of beamline BL5A at the Photon Factory,

537 KEK (Tsukuba, Japan) for technical support. This study was financially

538 supported by National Natural Science Foundation of China [U1432241 to

539 Y.G. and Z.Z., 31730001 and 91751000 to L.H., 92051109 to Z.Z.]; Strategic

540 Priority Research Program of the Chinese Academy of Sciences

541 [XDB37040302 to Y.D.]; National Basic Research Program of China

542 [2017YFA0504900 to Y.D.]; and Beijing Municipal Science and Technology

543 Commission [ Z191100007219007 to Y.D.]. Funding for open access charges

544 was provided by the National Natural Science Foundation of China.

545 We declare no conflict of interest.

546

547

## 548 **REFERENCE**

549 1. Wang JC. 1996. DNA topoisomerases. *Annu Rev Biochem* 65:635-92.

550 2. Champoux JJ. 2001. DNA topoisomerases: structure, function, and



- 551 mechanism. *Annu Rev Biochem* 70:369-413.
- 552 3. Vos SM, Tretter EM, Schmidt BH, Berger JM. 2011. All tangled up: how  
553 cells direct, manage and exploit topoisomerase function. *Nat Rev Mol*  
554 *Cell Biol* 12:827-41.
- 555 4. Pommier Y, Sun Y, Huang SN, Nitiss JL. 2016. Roles of eukaryotic  
556 topoisomerases in transcription, replication and genomic stability. *Nat*  
557 *Rev Mol Cell Biol* 17:703-721.
- 558 5. Forterre P. 2006. DNA topoisomerase V: a new fold of mysterious origin.  
559 *Trends Biotechnol* 24:245-7.
- 560 6. Lima CD, Wang JC, Mondragon A. 1994. Three-dimensional structure  
561 of the 67K N-terminal fragment of *E. coli* DNA topoisomerase I. *Nature*  
562 367:138-46.
- 563 7. Mondragon A, DiGate R. 1999. The structure of *Escherichia coli* DNA  
564 topoisomerase III. *Structure* 7:1373-83.
- 565 8. Hansen G, Harrenga A, Wieland B, Schomburg D, Reinemer P. 2006.  
566 Crystal structure of full length topoisomerase I from *Thermotoga*  
567 *maritima*. *J Mol Biol* 358:1328-40.
- 568 9. Tan K, Cao N, Cheng B, Joachimiak A, Tse-Dinh YC. 2016. Insights  
569 from the Structure of *Mycobacterium tuberculosis* Topoisomerase I with  
570 a Novel Protein Fold. *J Mol Biol* 428:182-93.
- 571 10. Cao N, Tan K, Zuo X, Annamalai T, Tse-Dinh Y-C. 2020. Mechanistic  
572 insights from structure of *Mycobacterium smegmatis* topoisomerase I

- 573 with ssDNA bound to both N- and C-terminal domains. *Nucleic acids*  
574 *research* 48:4448-4462.
- 575 11. Bocquet N, Bizard AH, Abdulrahman W, Larsen NB, Faty M, Cavadini S,  
576 Bunker RD, Kowalczykowski SC, Cejka P, Hickson ID, Thoma NH. 2014.  
577 Structural and mechanistic insight into Holliday-junction dissolution by  
578 topoisomerase IIIalpha and RMI1. *Nat Struct Mol Biol* 21:261-8.
- 579 12. Goto-Ito S, Yamagata A, Takahashi TS, Sato Y, Fukai S. 2017.  
580 Structural basis of the interaction between Topoisomerase IIIbeta and  
581 the TDRD3 auxiliary factor. *Sci Rep* 7:42123.
- 582 13. Rodriguez AC, Stock D. 2002. Crystal structure of reverse gyrase:  
583 insights into the positive supercoiling of DNA. *Embo j* 21:418-26.
- 584 14. Changela A, DiGate RJ, Mondragon A. 2001. Crystal structure of a  
585 complex of a type IA DNA topoisomerase with a single-stranded DNA  
586 molecule. *Nature* 411:1077-81.
- 587 15. Zhang Z, Cheng B, Tse-Dinh YC. 2011. Crystal structure of a covalent  
588 intermediate in DNA cleavage and rejoining by *Escherichia coli* DNA  
589 topoisomerase I. *Proc Natl Acad Sci U S A* 108:6939-44.
- 590 16. Berger JM, Fass D, Wang JC, Harrison SC. 1998. Structural similarities  
591 between topoisomerases that cleave one or both DNA strands. *Proc*  
592 *Natl Acad Sci U S A* 95:7876-81.
- 593 17. Brown PO, Cozzarelli NR. 1981. Catenation and knotting of duplex DNA  
594 by type 1 topoisomerases: a mechanistic parallel with type 2

- 595 topoisomerases. Proc Natl Acad Sci U S A 78:843-7.
- 596 18. Kirkegaard K, Wang JC. 1985. Bacterial DNA topoisomerase I can relax  
597 positively supercoiled DNA containing a single-stranded loop. J Mol Biol  
598 185:625-37.
- 599 19. Li Z, Mondragon A, DiGate RJ. 2001. The mechanism of type IA  
600 topoisomerase-mediated DNA topological transformations. Mol Cell  
601 7:301-7.
- 602 20. Cejka P, Plank JL, Dombrowski CC, Kowalczykowski SC. 2012.  
603 Decatenation of DNA by the *S. cerevisiae* Sgs1-Top3-Rmi1 and RPA  
604 complex: a mechanism for disentangling chromosomes. Mol Cell  
605 47:886-96.
- 606 21. Leelaram MN, Bhat AG, Godbole AA, Bhat RS, Manjunath R, Nagaraja  
607 V. 2013. Type IA topoisomerase inhibition by clamp closure. FASEB J  
608 27:3030-8.
- 609 22. Dekker NH, Rybenkov VV, Duguet M, Crisona NJ, Cozzarelli NR,  
610 Bensimon D, Croquette V. 2002. The mechanism of type IA  
611 topoisomerases. Proc Natl Acad Sci U S A 99:12126-31.
- 612 23. Terekhova K, Marko JF, Mondragon A. 2014. Single-molecule analysis  
613 uncovers the difference between the kinetics of DNA decatenation by  
614 bacterial topoisomerases I and III. Nucleic Acids Res 42:11657-67.
- 615 24. Mills M, Tse-Dinh YC, Neuman KC. 2018. Direct observation of  
616 topoisomerase IA gate dynamics. Nat Struct Mol Biol 25:1111-1118.

- 617 25. Liu LF, Wang JC. 1979. Interaction between DNA and Escherichia coli  
618 DNA topoisomerase I. Formation of complexes between the protein and  
619 superhelical and nonsuperhelical duplex DNAs. J Biol Chem  
620 254:11082-8.
- 621 26. Tse Y, Wang JC. 1980. E. coli and M. luteus DNA topoisomerase I can  
622 catalyze catenation of decatenation of double-stranded DNA rings. Cell  
623 22:269-76.
- 624 27. DiGate RJ, Marians KJ. 1988. Identification of a potent decatenating  
625 enzyme from Escherichia coli. J Biol Chem 263:13366-73.
- 626 28. Terekhova K, Gunn KH, Marko JF, Mondragon A. 2012. Bacterial  
627 topoisomerase I and topoisomerase III relax supercoiled DNA via  
628 distinct pathways. Nucleic Acids Res 40:10432-40.
- 629 29. Li Z, Mondragon A, Hiasa H, Marians KJ, DiGate RJ. 2000.  
630 Identification of a unique domain essential for Escherichia coli DNA  
631 topoisomerase III-catalysed decatenation of replication intermediates.  
632 Mol Microbiol 35:888-95.
- 633 30. Dai P, Wang Y, Ye R, Chen L, Huang L. 2003. DNA topoisomerase III  
634 from the hyperthermophilic archaeon Sulfolobus solfataricus with  
635 specific DNA cleavage activity. J Bacteriol 185:5500-7.
- 636 31. Couturier M, Gadelle D, Forterre P, Nadal M, Garnier F. 2020. The  
637 reverse gyrase TopR1 is responsible for the homeostatic control of DNA  
638 supercoiling in the hyperthermophilic archaeon Sulfolobus solfataricus.

- 639 Molecular Microbiology 113:356-368.
- 640 32. Bizard AH, Yang X, Debat H, Fogg JM, Zechiedrich L, Strick TR,  
641 Garnier F, Nadal M. 2018. TopA, the *Sulfolobus solfataricus*  
642 topoisomerase III, is a decatenase. *Nucleic Acids Res* 46:861-872.
- 643 33. Capranico G, Marinello J, Chillemi G. 2017. Type I DNA  
644 Topoisomerases. *J Med Chem* 60:2169-2192.
- 645 34. Schoeffler AJ, Berger JM. 2008. DNA topoisomerases: harnessing and  
646 constraining energy to govern chromosome topology. *Q Rev Biophys*  
647 41:41-101.
- 648 35. Feinberg H, Lima CD, Mondragon A. 1999. Conformational changes in  
649 *E. coli* DNA topoisomerase I. *Nat Struct Biol* 6:918-22.
- 650 36. Morales R, Sriratana P, Zhang J, Cann IK. 2011. *Methanosarcina*  
651 *acetivorans* C2A topoisomerase IIIalpha, an archaeal enzyme with  
652 promiscuity in divalent cation dependence. *PLoS One* 6:e26903.
- 653 37. Holm L, Sander C. 1995. Dali: a network tool for protein structure  
654 comparison. *Trends Biochem Sci* 20:478-80.
- 655 38. Yang J, Bachrati CZ, Ou J, Hickson ID, Brown GW. 2010. Human  
656 topoisomerase IIIalpha is a single-stranded DNA decatenase that is  
657 stimulated by BLM and RMI1. *J Biol Chem* 285:21426-36.
- 658 39. Tan K, Zhou Q, Cheng B, Zhang Z, Joachimiak A, Tse-Dinh YC. 2015.  
659 Structural basis for suppression of hypernegative DNA supercoiling by  
660 *E. coli* topoisomerase I. *Nucleic Acids Res* 43:11031-46.

- 661 40. Englund PT. 2014. A passion for parasites. *J Biol Chem* 289:33712-29.
- 662 41. Baker NM, Rajan R, Mondragon A. 2009. Structural studies of type I  
663 topoisomerases. *Nucleic Acids Res* 37:693-701.
- 664 42. Chen L, Huang L. 2006. Oligonucleotide cleavage and rejoining by  
665 topoisomerase III from the hyperthermophilic archaeon *Sulfolobus*  
666 *solfataricus*: temperature dependence and strand annealing-promoted  
667 DNA religation. *Mol Microbiol* 60:783-94.
- 668 43. Viard T, de la Tour CB. 2007. Type IA topoisomerases: a simple puzzle?  
669 *Biochimie* 89:456-67.
- 670 44. Viard T, Lamour V, Duguet M, Bouthier de la Tour C. 2001.  
671 Hyperthermophilic topoisomerase I from *Thermotoga maritima*. A very  
672 efficient enzyme that functions independently of zinc binding. *J Biol*  
673 *Chem* 276:46495-503.
- 674 45. Viard T, Cossard R, Duguet M, de La Tour CB. 2004. *Thermotoga*  
675 *maritima*-*Escherichia coli* chimeric topoisomerases. Answers about  
676 involvement of the carboxyl-terminal domain in DNA topoisomerase  
677 I-mediated catalysis. *J Biol Chem* 279:30073-80.
- 678 46. Zhang HL, DiGate RJ. 1994. The carboxyl-terminal residues of  
679 *Escherichia coli* DNA topoisomerase III are involved in substrate binding.  
680 *J Biol Chem* 269:9052-9.
- 681 47. Krishna SS, Majumdar I, Grishin NV. 2003. Structural classification of  
682 zinc fingers: survey and summary. *Nucleic Acids Res* 31:532-50.

- 683 48. Tse-Dinh YC. 1991. Zinc (II) coordination in Escherichia coli DNA  
684 topoisomerase I is required for cleavable complex formation with DNA.  
685 J Biol Chem 266:14317-20.
- 686 49. Liu H, Naismith JH. 2008. An efficient one-step site-directed deletion,  
687 insertion, single and multiple-site plasmid mutagenesis protocol. BMC  
688 Biotechnol 8:91.
- 689 50. Wang H, Liu X, Zhao J, Yue Q, Yan Y, Gao Z, Dong Y, Zhang Z, Fan Y,  
690 Tian J, Wu N, Gong Y. 2018. Crystal structures of multicopper oxidase  
691 CueO G304K mutant: structural basis of the increased laccase activity.  
692 Scientific Reports 8:14252.
- 693 51. Otwinowski Z, Minor W. 1997. Processing of X-ray diffraction data  
694 collected in oscillation mode. Methods Enzymol 276:307-326.
- 695 52. McCoy AJ, Grosse-Kunstleve RW, Adams PD, Winn MD, Storoni LC,  
696 Read RJ. 2007. Phaser crystallographic software. J Appl Crystallogr  
697 40:658-674.
- 698 53. Afonine PV, Grosse-Kunstleve RW, Adams PD. 2005. A robust  
699 bulk-solvent correction and anisotropic scaling procedure. Acta  
700 Crystallogr D Biol Crystallogr 61:850-5.
- 701 54. Murshudov GN, Skubak P, Lebedev AA, Pannu NS, Steiner RA,  
702 Nicholls RA, Winn MD, Long F, Vagin AA. 2011. REFMAC5 for the  
703 refinement of macromolecular crystal structures. Acta Crystallogr D Biol  
704 Crystallogr 67:355-67.

705 55. Emsley P, Cowtan K. 2004. Coot: model-building tools for molecular  
706 graphics. *Acta Crystallogr D Biol Crystallogr* 60:2126-32.

707 56. Chen VB, Arendall WB, 3rd, Headd JJ, Keedy DA, Immormino RM,  
708 Kapral GJ, Murray LW, Richardson JS, Richardson DC. 2010.  
709 MolProbity: all-atom structure validation for macromolecular  
710 crystallography. *Acta Crystallogr D Biol Crystallogr* 66:12-21.

711

712

713

714

715

716

717

718

719

720

721

722

723

## 724 **TABLE AND FIGURES LEGENDS**

725 Table 1. Data collection and refinement statistics

---

|                 | Native Sso topo III |
|-----------------|---------------------|
| Data collection |                     |
| Space group     | P2 <sub>1</sub>     |
| Cell dimensions |                     |
| a, b, c (Å)     | 110.7, 90.0, 156.2  |



|                               |                                  |
|-------------------------------|----------------------------------|
| $\alpha, \beta, \gamma$ (°)   | 90.0, 100.5, 90.0                |
| Wavelength (Å)                | 0.98                             |
| Resolution (Å)                | 50-2.10 (2.14-2.10) <sup>a</sup> |
| Rmerge                        | 0.057 (0.942)                    |
| $\langle I/\sigma(I) \rangle$ | 25.8 (2.0)                       |
| Completeness (%)              | 98.0 (94.5)                      |
| Redundancy                    | 7.0                              |
| Refinement                    |                                  |
| Resolution (Å)                | 50-2.10                          |
| No. reflections               | 171,737                          |
| <hr/>                         |                                  |
| Rwork/ Rfree                  | 0.203/0.247                      |
| No. atoms                     |                                  |
| Protein                       | 21,559                           |
| DNA                           | -                                |
| ZN                            | 4                                |
| Water                         | 1020                             |
| B-factors                     | 46.0                             |

|                      |       |
|----------------------|-------|
| Rmsd bond length (Å) | 0.008 |
| Rmsd bond angle (°)  | 0.9   |
| Ramachandran Plot    |       |
| Favoured (%)         | 97.8  |
| Allowed (%)          | 2.2   |
| Outliers (%)         | 0.0   |

---

726

727

a. The values in parenthesis mean those of the highest resolution shell.

728

729

730

731

732

733

734

735

736

737

738

739

740

741

## 742 **FIGURES LEGENDS**

743 FIG 1 Overall structure of full-length Sso topo III in apo state.

744 A. Domain organization of Sso topo III. Sso topo III is composed of N-terminal

745 four domains (domain I-IV) and the unique carboxyl-terminal domain V.

746 Domains I-V are colored hotpink, green, cyan, orange, red, respectively.

747 B. C. Two views of Sso topo III. Domains I-V are colored as the legend to

748 Figure 1A. The close-up view (D) is highlighted by the solid box in B. Detailed

749 interactions (E and F) within the domains II/V interface is highlighted by the  
750 solid box in C.

751 D. The close-up view shows the anomalous difference electron density map  
752 (drawn in cyan mesh) around Zn (II) contoured at  $15\sigma$  using the diffraction data  
753 collected at the Zn absorption peak. The three Cys (C602, C605, C615) and  
754 one His residue (H618) coordinating Zn (II) are shown in sticks. Zn (II) is  
755 shown as a gray sphere.

756 E. Hydrophobic zipper between domain V residues from helix  $\alpha 19$  and domain  
757 II residues from the loop linking domain I and II. The hydrophobic interactions  
758 are shown in space-filling presentations.

759 F. As in E but describing the corresponding hydrogen-bonding network. The  
760 hydrogen bonds are shown as black dashed lines.

761

762

763

764 FIG 2 Comparison of structural elements around the hinge region in Sso topo  
765 III, EcTOP1, EcTOP3, HsTop3 $\alpha$  and HsTop3 $\beta$ .

766 A. Overall structural comparison among Sso topo III (hotpink), EcTOP3 (green)  
767 and HsTop3 $\alpha$  (cyan). For clarity, the RMI1 subunit of HsTop3 $\alpha$  complex (PDB  
768 entry 4CHT) is not shown. Domain V of Sso topo III is indicated. The  
769 decatenation loop and the acidic loop of EcTOP3 (PDB entry 1D6M) are  
770 shown, and their movement during the gate dynamics is shown with opposing

771 arrows.

772 B. The close-up views around the hinge regions of HsTop3 $\alpha$  in Top3 $\alpha$ -RMI1  
773 complex (PDB entry 4CHT), HsTop3 $\beta$  in Top3 $\beta$ -TDRD3 complex (PDB entry  
774 5GVE) complexes, and EcTOP1, mainly showing the hydrophobic interactions.  
775 The hydrogen bonds are shown as black dashed lines. For clarity, the ssDNA  
776 molecule of EcTOP1 complex (PDB entry 4RUL) is not shown.

777 C. The close-up view around the hinge region of Sso topo III, showing the  
778 hydrophobic interactions. For clarity, helix  $\alpha$ 20 (residues 639-654) of Sso topo  
779 III is not shown.

780

781 FIG 3 Relaxation activity of wild-type and mutant Sso topo III proteins.

782 pUC18 DNA was incubated at 75 °C for 30 min in relaxation reaction buffer (50  
783 mM Tris-HCl (pH 8.8), 20 mM MgCl<sub>2</sub>, 1 mM DTT, 0.1 mM EDTA, 90 mM  
784 sodium chloride, 30  $\mu$ gml<sup>-1</sup> BSA, and 12% (vol/vol) ethylene glycol)) with  
785 wild-type Sso topo III (top panel), 597 $\Delta$ C (middle panel) and CCCH/4A (bottom  
786 panel) at 500, 250, 62.5, 12, 6, 3, 1.5 and 0 fmol. Reactions were terminated;  
787 the DNA products were separated in 1.4% agarose gels and visualized by  
788 staining with ethidium bromide. Oc indicates open circle nicked or gapped  
789 circular DNA; Sc denotes negatively supercoiled circular DNA; and Rel is the  
790 relaxed topoisomers.

791

792 FIG 4 Time-course of DNA relaxation by wild-type and mutants Sso topo III

793 proteins.

794 DNA relaxation by wild-type *Sso* topo III (top panel), 597 $\Delta$ C (middle panel) and  
795 CCCH/4A mutant (bottom panel), were carried out over the indicated time  
796 periods as described in the FIG 3. The molar ratio of protein to pUC18 DNA  
797 was 1:1 in the reaction. Samples terminated at the indicated time-points.  
798 Sample at 0-min point indicated untreated substrate pUC18 DNA. The reaction  
799 products were analyzed in 1.4% agarose gels and visualized by staining with  
800 ethidium bromide. Oc indicates open circle nicked or gapped circular DNA; Sc  
801 denotes negatively supercoiled circular DNA; and Rel is the relaxed  
802 topoisomers.

803

804 FIG 5 kinetoplast DNA (kDNA) decatenation by wild-type and mutants *Sso*  
805 topo III proteins.

806 Decatenation assays were carried out as described for DNA relaxation assay  
807 except that kDNA (400 ng) was used as substrate with wild-type *Sso* topo III,  
808 597 $\Delta$ C and CCCH/4A mutant at 1000, 500, 250, 62.5 and 12 fmol. The  
809 reactions were performed at 90°C for 30 min and were terminated. Samples  
810 were electrophoresed through a 2% agarose gel, and the DNA products were  
811 visualized by staining with ethidium bromide. Lane CK corresponds to the  
812 kDNA control incubated at 90°C without the enzyme. Minicircles denote  
813 minicircle DNA released by *Sso* topo III.

814

815

# FIG 1

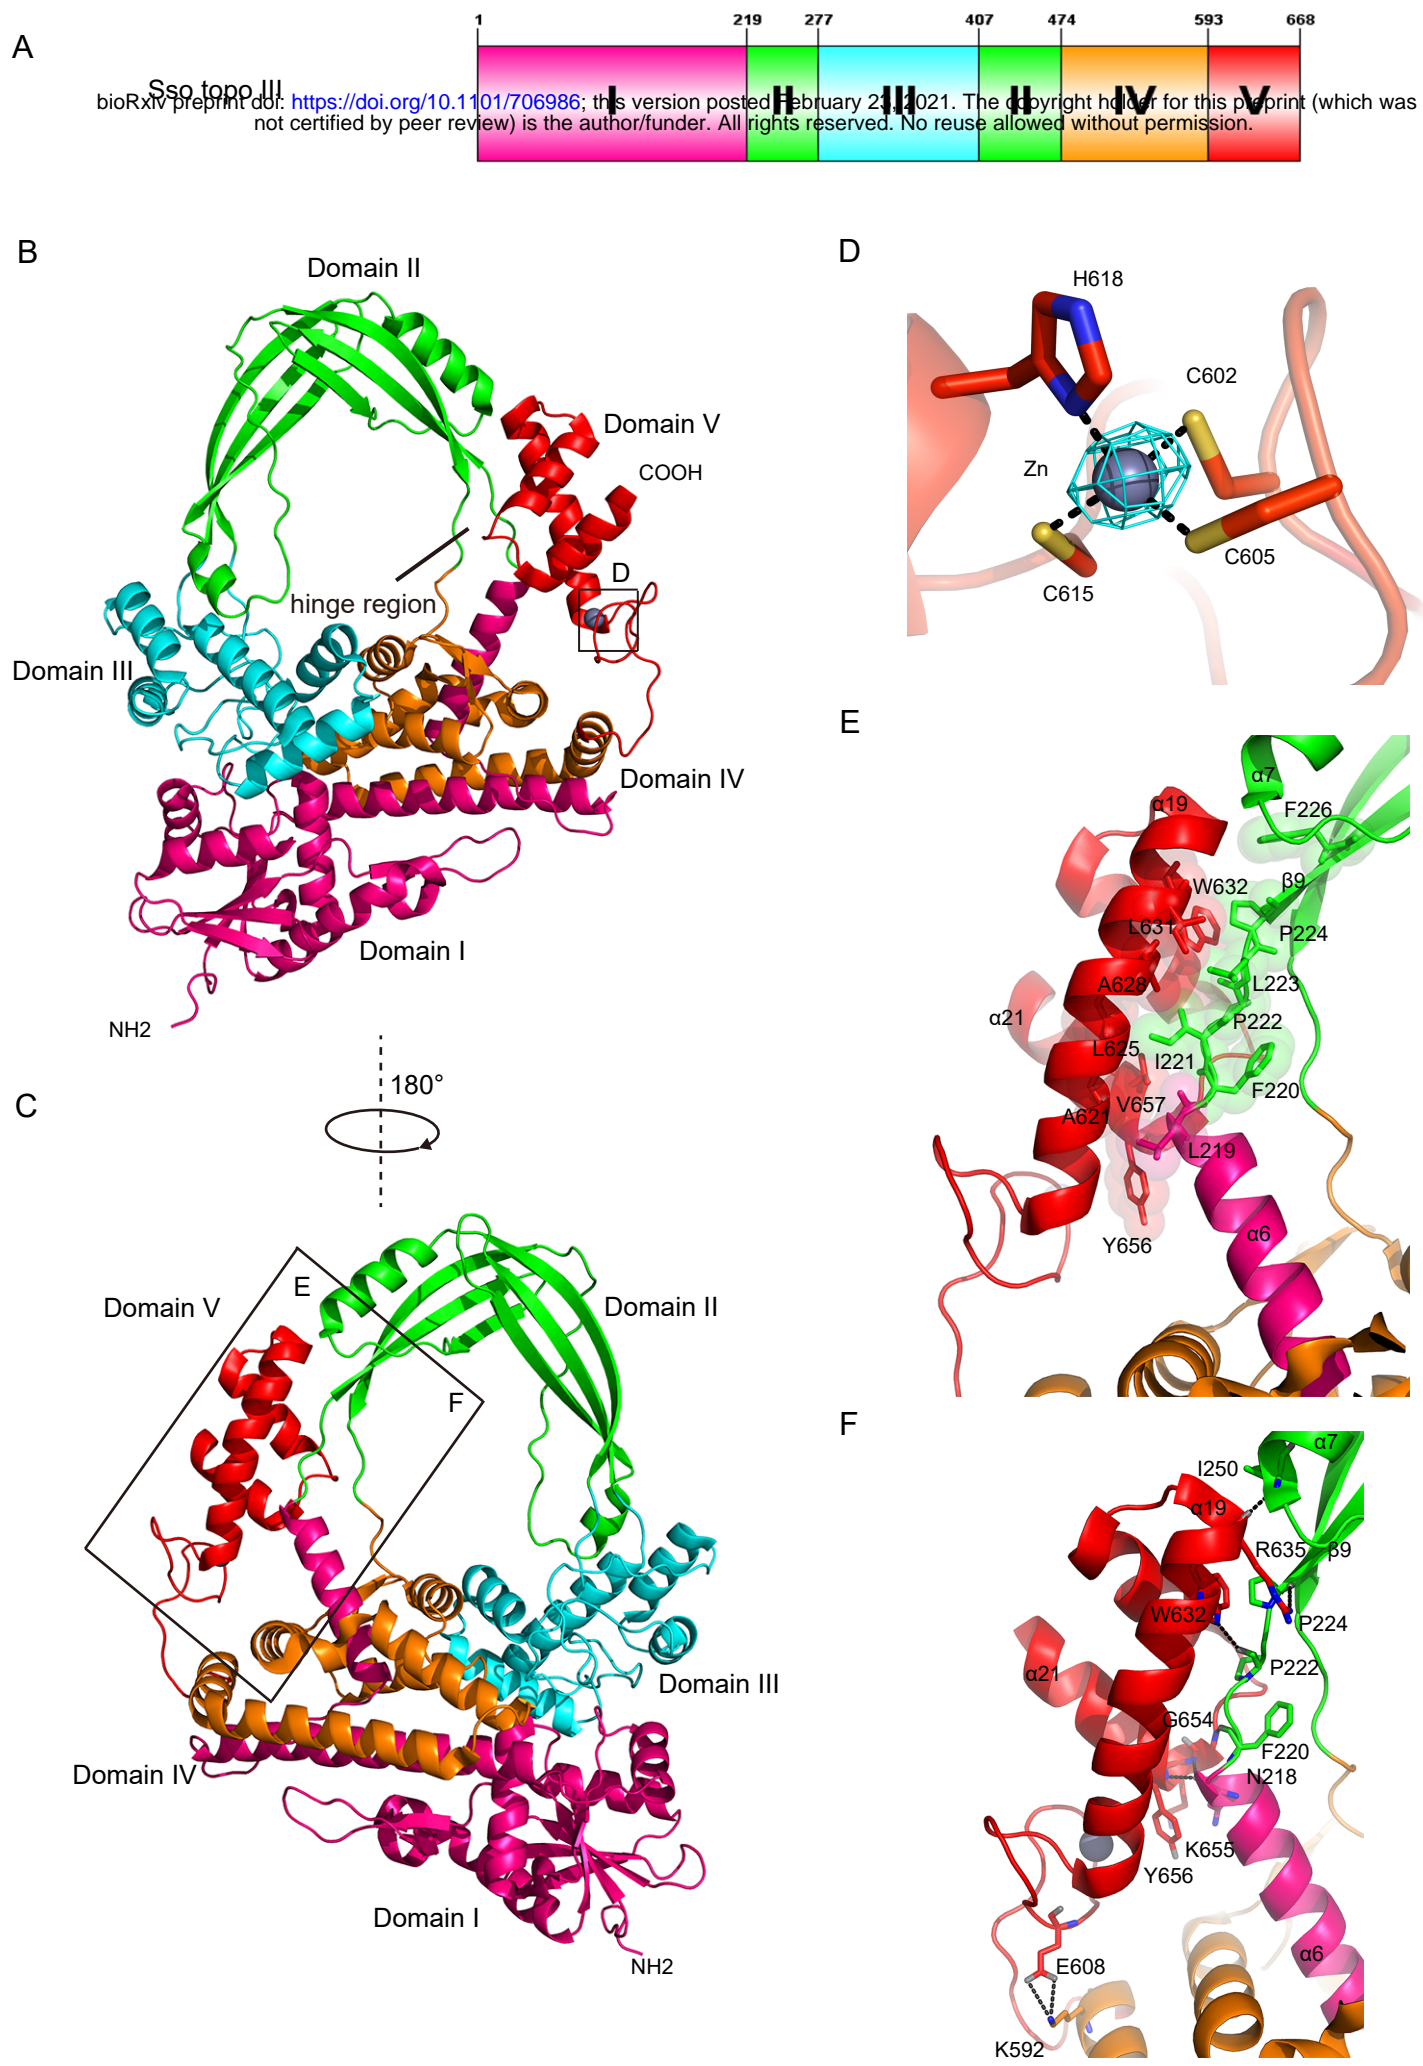

# FIG 2

A

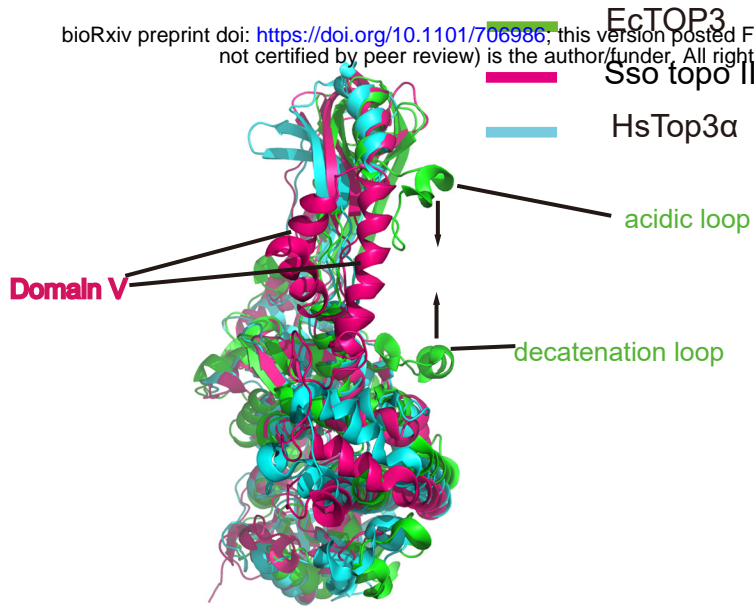

C

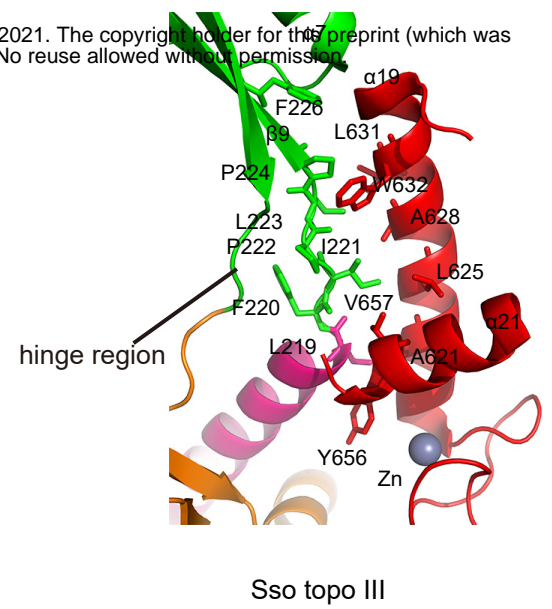

B

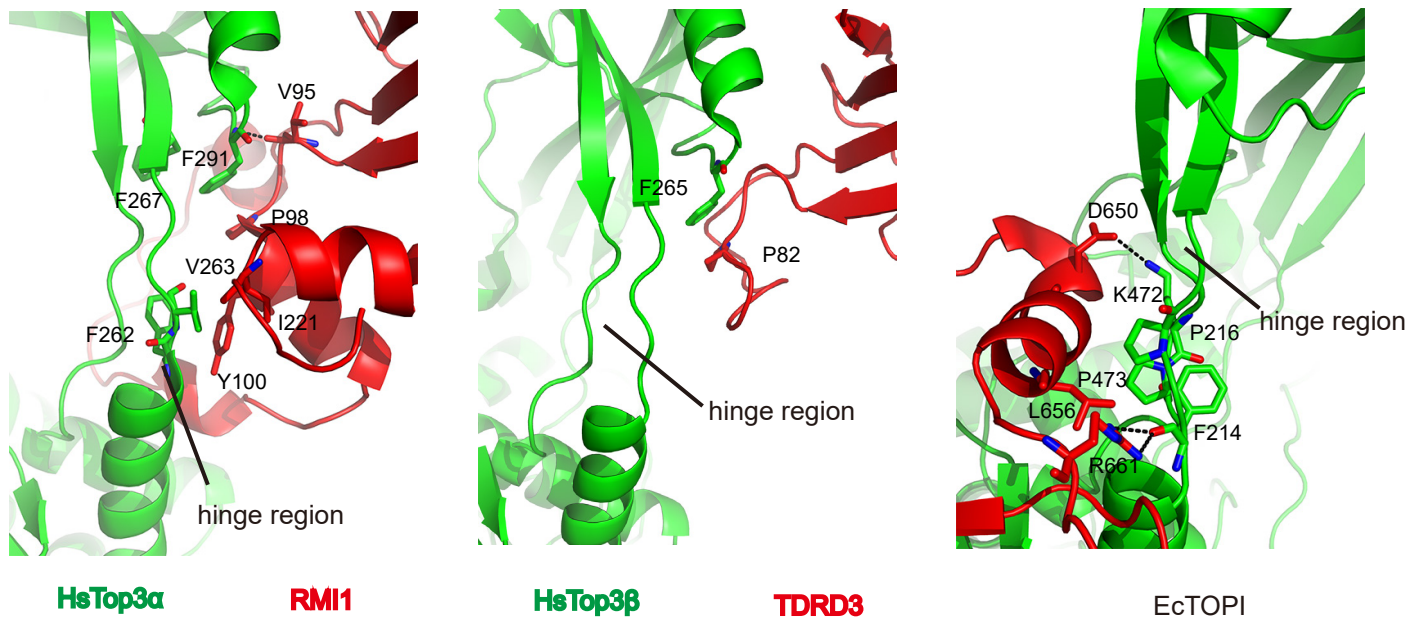

# FIG 3

bioRxiv preprint doi: <https://doi.org/10.1101/706986>; this version posted February 23, 2021. The copyright holder for this preprint (which was not certified by peer review) is the author/funder. All rights reserved. No reuse allowed without permission.

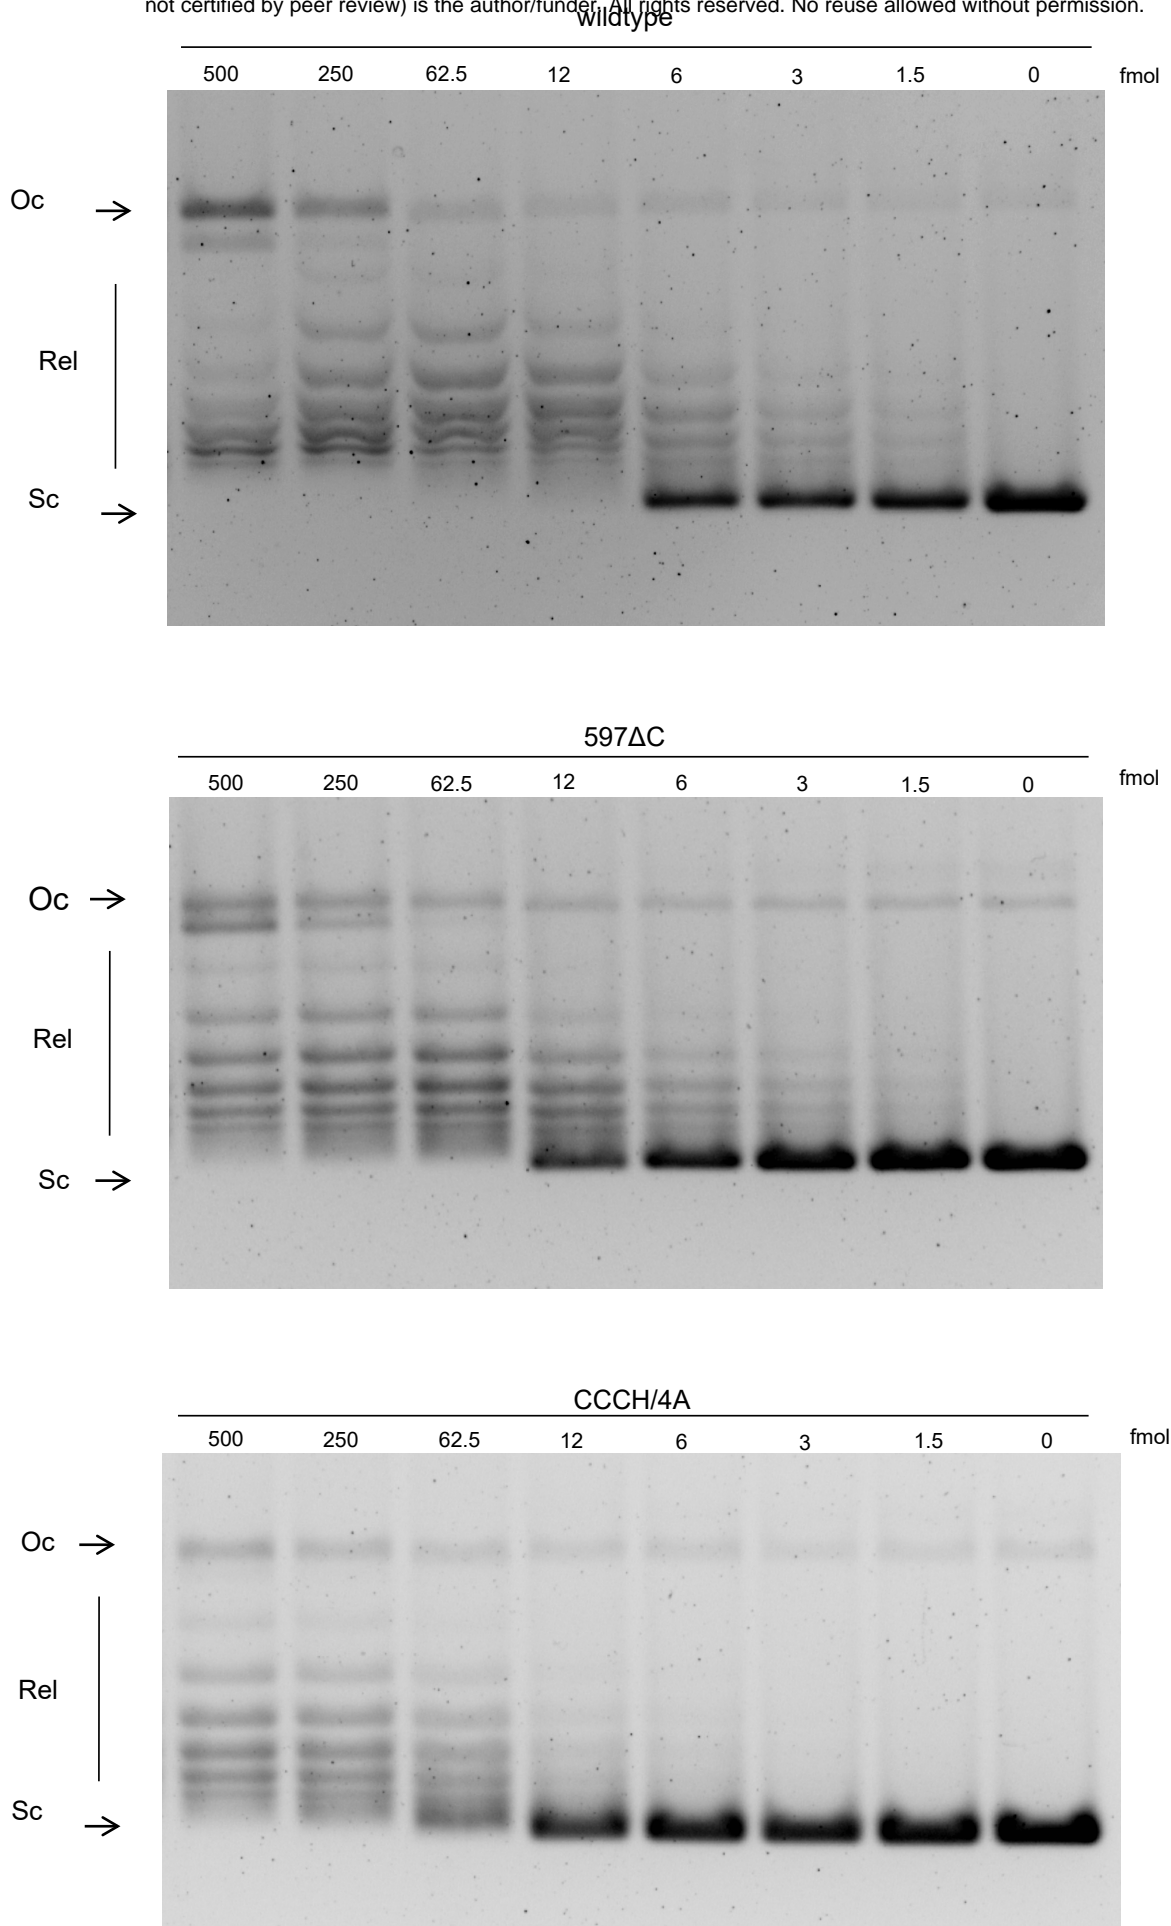



# FIG 4

bioRxiv preprint doi: <https://doi.org/10.1101/706986>; this version posted February 23, 2021. The copyright holder for this preprint (which was not certified by peer review) is the author/funder. All rights reserved. No reuse allowed without permission.

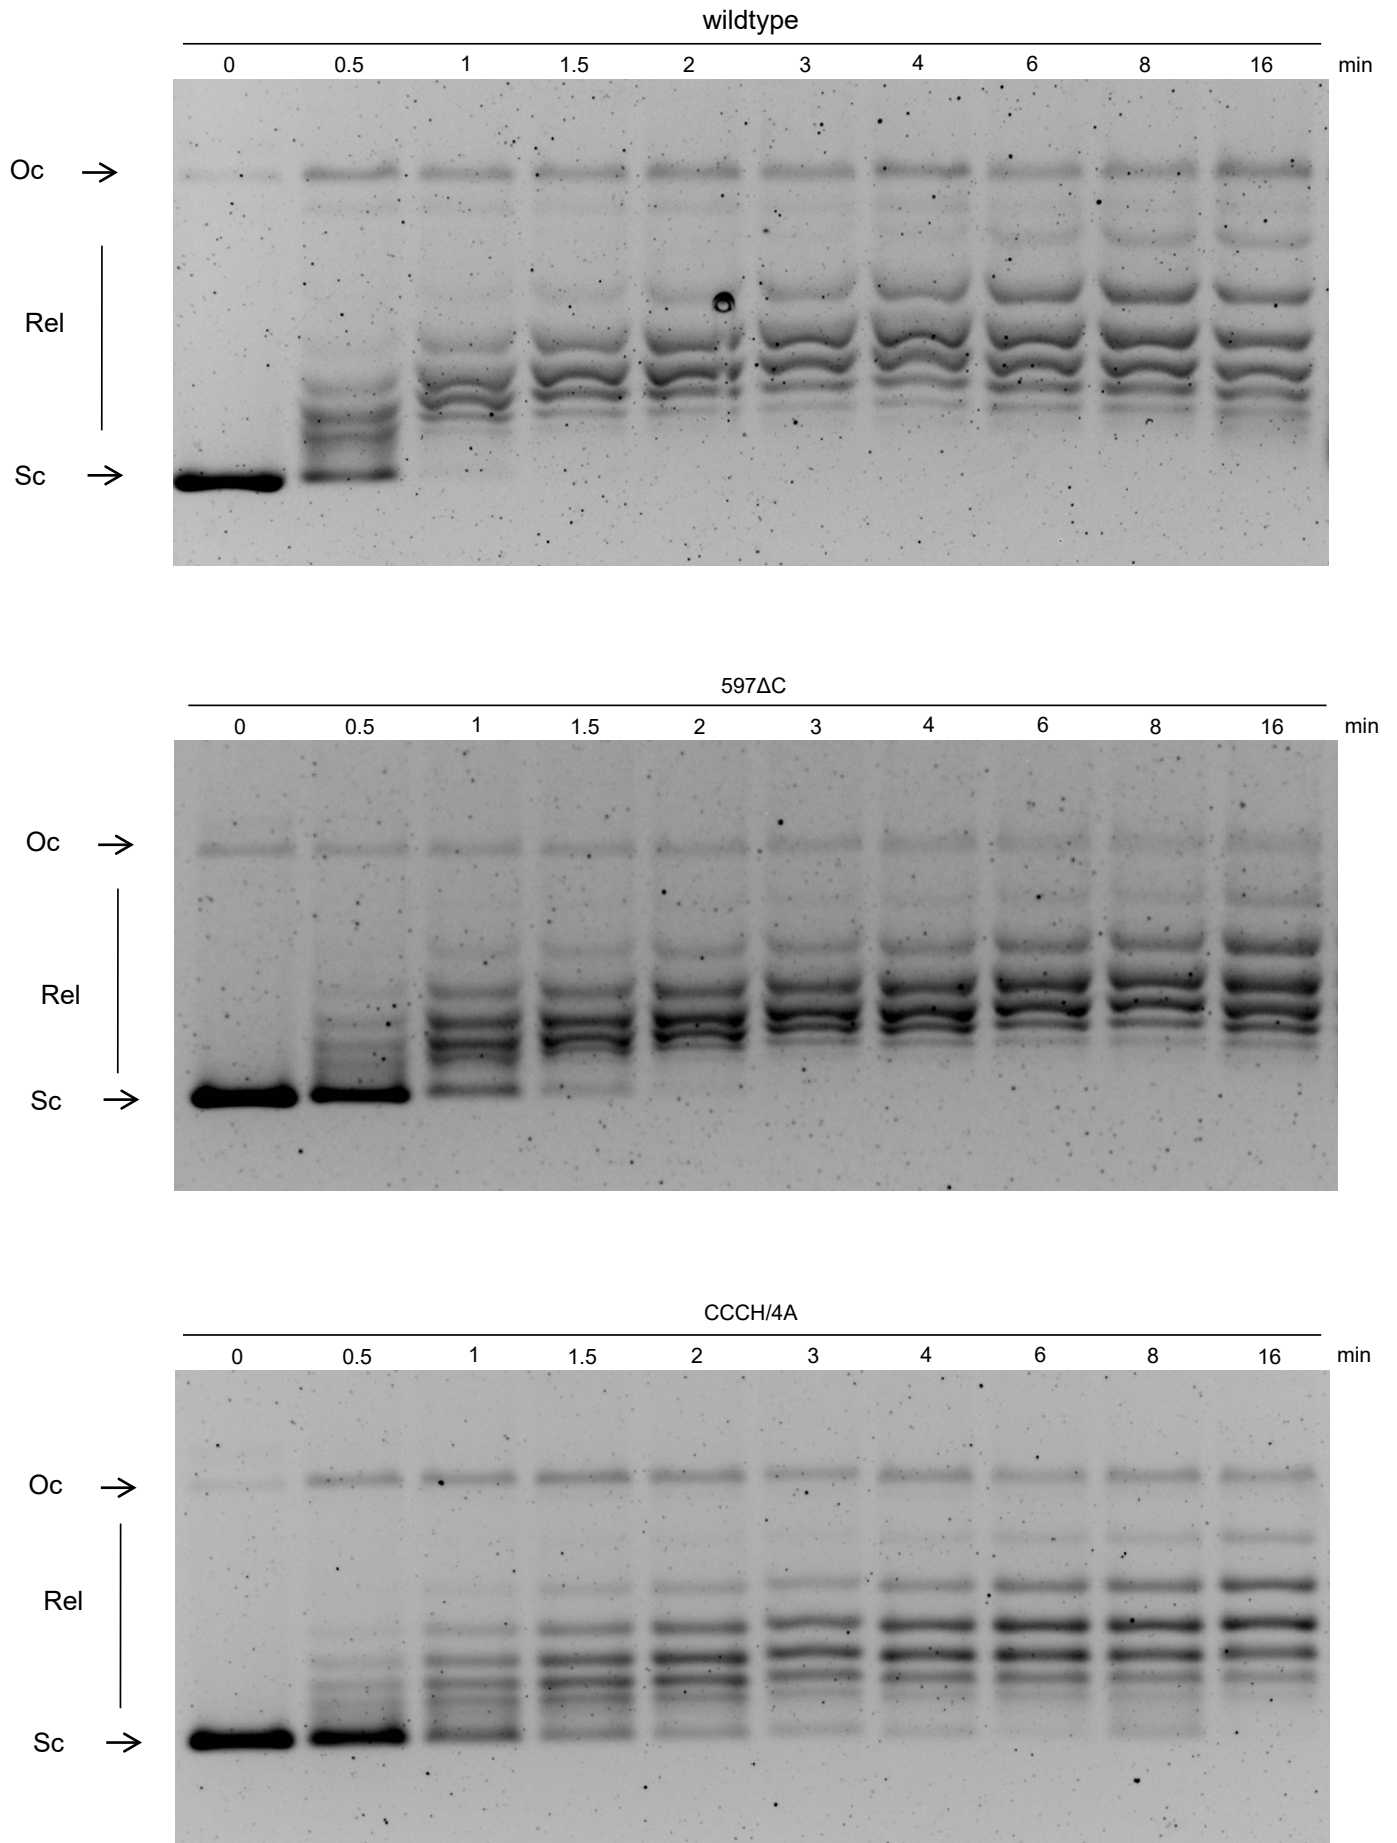

# FIG 5

A

bioRxiv preprint doi: <https://doi.org/10.1101/706986>; this version posted February 23, 2021. The copyright holder for this preprint (which was not certified by peer review) is the author/funder. All rights reserved. No reuse allowed without permission.

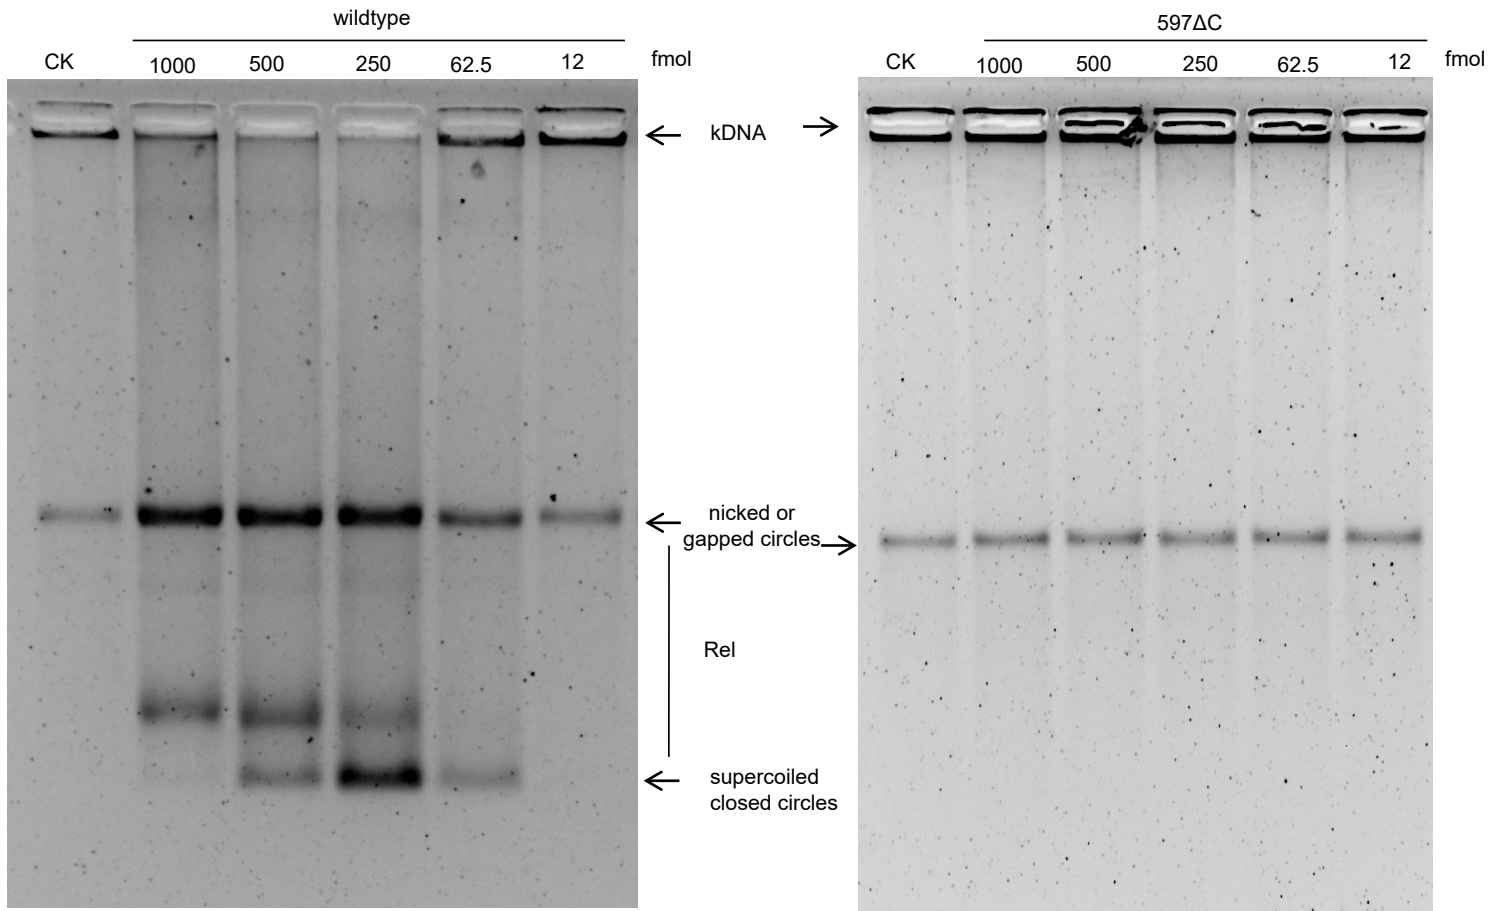

C

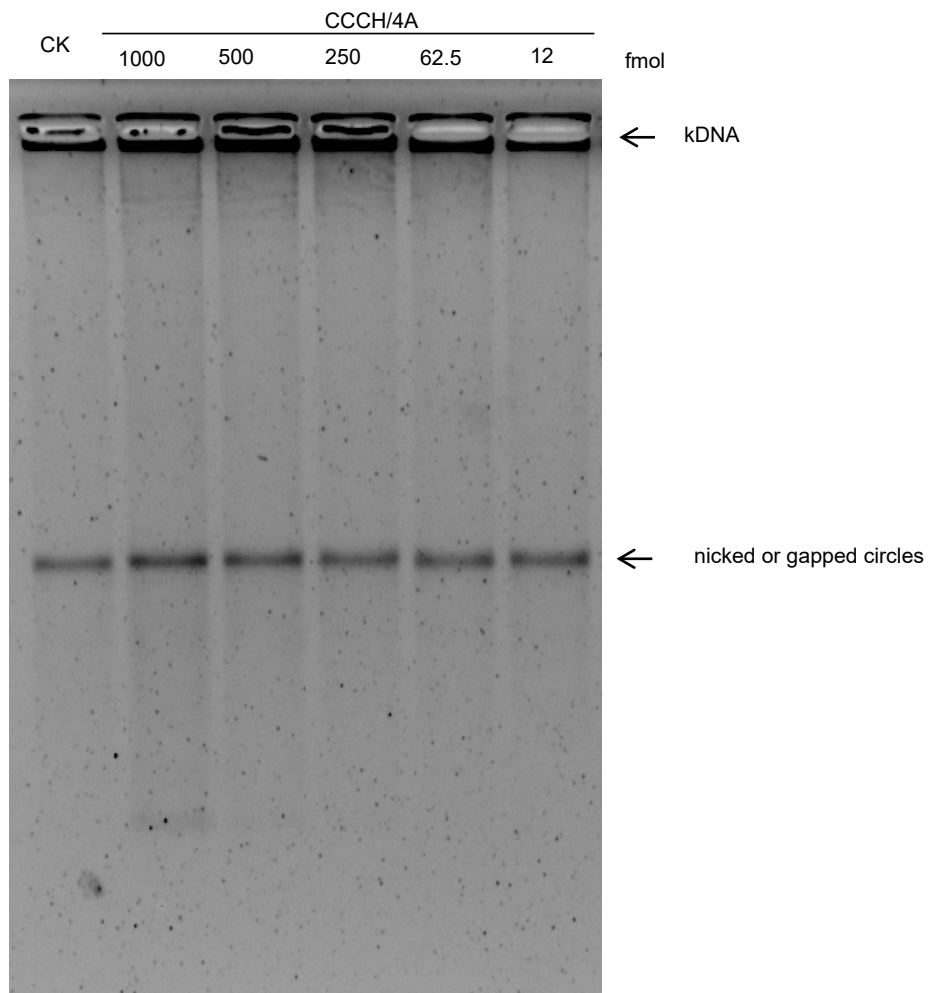

Source: https://www.biorxiv.org/content/biorxiv/early/2021/02/23/706986.full.pdf
